# Supplementary material
Source: Springer Nature journal article supplement (https://www.springermedizin.de/resource/supplementary/12879_2013_3733_MOESM2_ESM.pdf/9446566)

### Susceptibility of *Salmonella enterica* sorovar Typhi

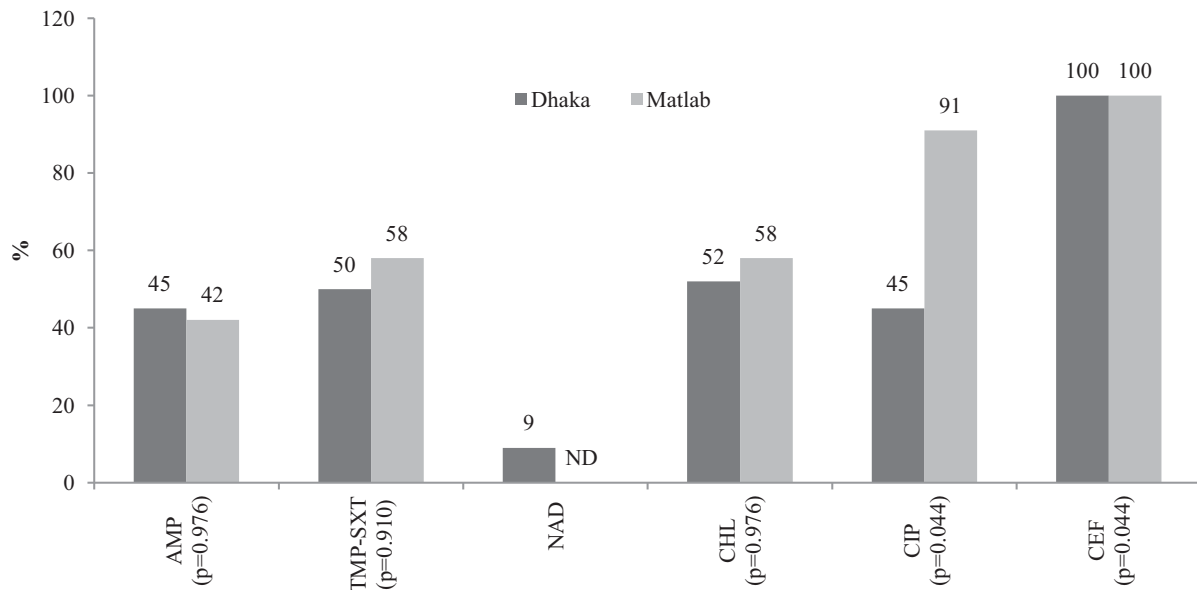

### Susceptibility of *Salmonella enterica* sorotype Paratyphi

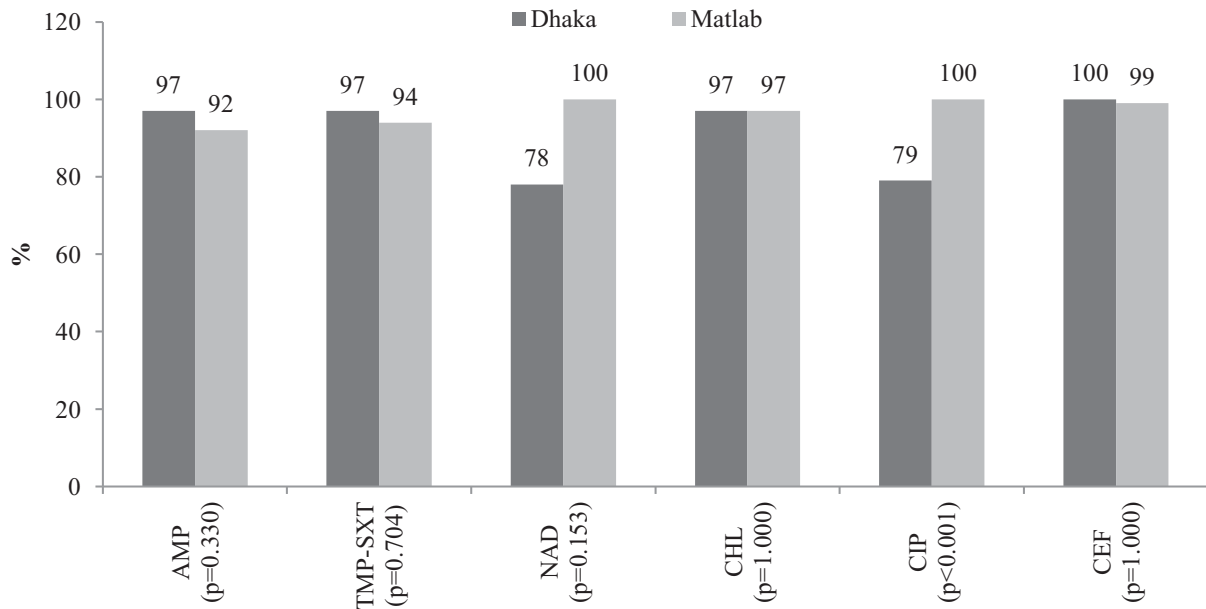

Supplement: MOESM2 [file 9446566]
